# Supplementary material
Source: MDPI journal article supplement (https://www.mdpi.com/2073-4395/14/5/888)

**Table S1** Effect of organic fertilizer substitution on grain biomass, straw biomass and harvest indexes of wheat from 2017 to 2021. Values are means of triplicate samples and are not significantly different at  $P < 0.05$  when followed by the same lowercase letters.

| Treatments and cropping season | Grain biomass (Mg ha <sup>-1</sup> ) | Straw biomass (Mg ha <sup>-1</sup> ) | Harvest index |
|--------------------------------|--------------------------------------|--------------------------------------|---------------|
| 2017                           |                                      |                                      |               |
| CK                             | 3.8b                                 | 4.2a                                 | 0.47a         |
| MF                             | 6.9a                                 | 8.1a                                 | 0.46a         |
| 20%OF                          | 6.8a                                 | 8.2a                                 | 0.45a         |
| 40%OF                          | 6.7a                                 | 7.9a                                 | 0.46a         |
| 2018                           |                                      |                                      |               |
| CK                             | 3.3b                                 | 3.7b                                 | 0.47a         |
| MF                             | 7.0a                                 | 8.1a                                 | 0.46a         |
| 20%OF                          | 6.8a                                 | 7.8a                                 | 0.47a         |
| 40%OF                          | 6.8a                                 | 7.5a                                 | 0.48a         |
| 2019                           |                                      |                                      |               |
| CK                             | 2.2b                                 | 2.3b                                 | 0.45a         |
| MF                             | 5.3a                                 | 5.7a                                 | 0.45a         |
| 20%OF                          | 5.4a                                 | 5.6a                                 | 0.45a         |
| 40%OF                          | 5.5a                                 | 5.8a                                 | 0.44a         |
| 2020                           |                                      |                                      |               |
| CK                             | 2.2b                                 | 3.2b                                 | 0.41a         |
| MF                             | 5.9a                                 | 7.4a                                 | 0.44a         |
| 20%OF                          | 5.4a                                 | 7.3a                                 | 0.43a         |
| 40%OF                          | 5.6a                                 | 7.4a                                 | 0.43a         |
| 2021                           |                                      |                                      |               |
| CK                             | 2.4b                                 | 3.0b                                 | 0.44a         |
| MF                             | 6.7a                                 | 8.3a                                 | 0.45a         |
| 20%OF                          | 6.7a                                 | 8.1a                                 | 0.45a         |
| 40%OF                          | 6.7a                                 | 8.3a                                 | 0.45a         |

**Table S2** Effect of organic fertilizer substitution on grain biomass, straw biomass and harvest indexes of maize from 2017 to 2020. Values are means of triplicate samples and are not significantly different at  $P < 0.05$  when followed by the same lowercase letters.

| Treatments and cropping season | Grain biomass (Mg ha <sup>-1</sup> ) | Straw biomass (Mg ha <sup>-1</sup> ) | Harvest index |
|--------------------------------|--------------------------------------|--------------------------------------|---------------|
| 2017                           |                                      |                                      |               |
| CK                             | 6.0b                                 | 5.4b                                 | 0.53a         |
| MF                             | 8.7a                                 | 7.8a                                 | 0.53a         |
| 20% OF                         | 8.5a                                 | 7.7a                                 | 0.52a         |
| 40% OF                         | 8.6a                                 | 7.8a                                 | 0.52a         |
| 2018                           |                                      |                                      |               |
| CK                             | 5.9b                                 | 5.6b                                 | 0.51a         |
| MF                             | 8.4a                                 | 8.2a                                 | 0.51a         |
| 20% OF                         | 8.2a                                 | 8.0a                                 | 0.51a         |
| 40% OF                         | 8.3a                                 | 7.9a                                 | 0.51a         |
| 2019                           |                                      |                                      |               |
| CK                             | 7.2b                                 | 6.9b                                 | 0.51a         |
| MF                             | 10.1a                                | 9.4a                                 | 0.52a         |
| 20% OF                         | 10.0a                                | 9.2a                                 | 0.52a         |
| 40% OF                         | 9.9a                                 | 9.3a                                 | 0.52a         |
| 2020                           |                                      |                                      |               |
| CK                             | 5.2b                                 | 5.0b                                 | 0.51a         |
| MF                             | 9.3a                                 | 8.8a                                 | 0.51a         |
| 20% OF                         | 9.5a                                 | 9.1a                                 | 0.51a         |
| 40% OF                         | 9.6a                                 | 9.2a                                 | 0.51a         |

**Table S3** Effect of organic fertilizer substitution on N, P and K accumulation of wheat from 2017 to 2021. Values are means of triplicate samples and are not significantly different at  $P < 0.05$  when followed by the same lowercase letters.

| Treatments and cropping season | N accumulation (kg ha <sup>-1</sup> ) |       | P accumulation (kg ha <sup>-1</sup> ) |       | K accumulation (kg ha <sup>-1</sup> ) |        |
|--------------------------------|---------------------------------------|-------|---------------------------------------|-------|---------------------------------------|--------|
|                                | Grain                                 | Straw | Grain                                 | Straw | Grain                                 | Straw  |
| 2017                           |                                       |       |                                       |       |                                       |        |
| CK                             | 71.7c                                 | 21.5b | 13.0c                                 | 2.5b  | 14.7b                                 | 64.3b  |
| MF                             | 188.6a                                | 67.0a | 27.2a                                 | 4.5a  | 30.9a                                 | 190.4a |
| 20%OF                          | 168.1b                                | 69.0a | 24.9ab                                | 4.0a  | 29.5a                                 | 172.7a |
| 40%OF                          | 164.1b                                | 65.3a | 21.9b                                 | 4.2a  | 29.2a                                 | 180.2a |
| 2018                           |                                       |       |                                       |       |                                       |        |
| CK                             | 62.9b                                 | 18.9b | 11.8c                                 | 2.9b  | 13.3b                                 | 64.0b  |
| MF                             | 195.7a                                | 67.0a | 29.3 a                                | 4.5a  | 33.0a                                 | 205.9a |
| 20%OF                          | 170.3a                                | 65.4a | 26.1 ab                               | 4.1a  | 30.7a                                 | 193.4a |
| 40%OF                          | 167.9a                                | 62.4a | 23.3 b                                | 4.0ab | 30.8a                                 | 191.5a |
| 2019                           |                                       |       |                                       |       |                                       |        |
| CK                             | 42.4b                                 | 13.1b | 9.1b                                  | 2.1b  | 8.7b                                  | 52.6b  |
| MF                             | 139.8a                                | 51.9a | 18.6a                                 | 4.6a  | 20.1a                                 | 195.4a |
| 20%OF                          | 141.0a                                | 50.8a | 17.9a                                 | 4.4a  | 19.9a                                 | 184.4a |
| 40%OF                          | 143.1a                                | 57.0a | 18.0a                                 | 4.8a  | 20.0a                                 | 202.1a |
| 2020                           |                                       |       |                                       |       |                                       |        |
| CK                             | 44.6b                                 | 14.4b | 8.3b                                  | 1.9b  | 7.8b                                  | 50.3b  |
| MF                             | 146.7a                                | 59.2a | 19.4a                                 | 4.7a  | 23.2a                                 | 167.0a |
| 20%OF                          | 132.9a                                | 56.4a | 18.4a                                 | 4.6a  | 21.2a                                 | 146.3a |
| 40%OF                          | 138.3a                                | 56.5a | 18.9a                                 | 4.2a  | 22.0a                                 | 152.1a |
| 2021                           |                                       |       |                                       |       |                                       |        |
| CK                             | 47.3b                                 | 10.9b | 8.1b                                  | 1.9b  | 7.2b                                  | 44.2b  |
| MF                             | 162.9a                                | 58.9a | 19.5a                                 | 4.7a  | 22.7a                                 | 169.8a |
| 20%OF                          | 160.2a                                | 55.4a | 20.1a                                 | 4.5a  | 22.4a                                 | 154.7a |
| 40%OF                          | 162.0a                                | 55.5a | 20.1a                                 | 4.6a  | 22.8a                                 | 161.6a |

**Table S4** Effect of organic fertilizer substitution on N, P and K accumulation of maize from 2017 to 2020. Values are means of triplicate samples and are not significantly different at  $P < 0.05$  when followed by the same lowercase letters.

| Treatments and cropping season | N accumulation<br>(kg ha <sup>-1</sup> ) |       | P accumulation<br>(kg ha <sup>-1</sup> ) |       | K accumulation<br>(kg ha <sup>-1</sup> ) |        |
|--------------------------------|------------------------------------------|-------|------------------------------------------|-------|------------------------------------------|--------|
|                                | Grain                                    | Straw | Grain                                    | Straw | Grain                                    | Straw  |
| 2017                           |                                          |       |                                          |       |                                          |        |
| CK                             | 85.0b                                    | 47.0b | 32.0b                                    | 6.1b  | 35.8a                                    | 90.9b  |
| MF                             | 145.5a                                   | 77.3a | 50.4a                                    | 10.2a | 53.1a                                    | 144.0a |
| 20%OF                          | 146.4a                                   | 79.1a | 49.0a                                    | 9.6a  | 52.5a                                    | 143.7a |
| 40%OF                          | 143.8a                                   | 80.5a | 46.7a                                    | 10.2a | 47.1a                                    | 147.1a |
| 2018                           |                                          |       |                                          |       |                                          |        |
| CK                             | 88.6b                                    | 46.0b | 33.3b                                    | 7.1b  | 37.3c                                    | 89.1b  |
| MF                             | 149.3a                                   | 76.6a | 51.7a                                    | 10.1a | 54.5a                                    | 142.8a |
| 20%OF                          | 149.8a                                   | 76.6a | 50.2a                                    | 9.4a  | 53.7ab                                   | 139.4a |
| 40%OF                          | 147.1a                                   | 77.2a | 47.8a                                    | 9.7a  | 48.2b                                    | 141.0a |
| 2019                           |                                          |       |                                          |       |                                          |        |
| CK                             | 107.9b                                   | 49.1b | 40.7b                                    | 5.1b  | 36.3b                                    | 95.7b  |
| MF                             | 179.0a                                   | 85.0a | 61.8a                                    | 7.7a  | 52.2a                                    | 130.5a |
| 20%OF                          | 183.0a                                   | 83.5a | 61.5a                                    | 7.1a  | 52.5a                                    | 129.9a |
| 40%OF                          | 174.9a                                   | 79.5a | 56.5a                                    | 7.4a  | 46.0ab                                   | 123.2a |
| 2020                           |                                          |       |                                          |       |                                          |        |
| CK                             | 79.1b                                    | 35.9b | 30.6b                                    | 6.5b  | 31.7b                                    | 86.7b  |
| MF                             | 158.6a                                   | 78.3a | 56.1a                                    | 11.9a | 52.3a                                    | 159.1a |
| 20%OF                          | 152.9a                                   | 80.5a | 53.5a                                    | 11.6a | 54.9a                                    | 150.8a |
| 40%OF                          | 153.6a                                   | 82.6a | 53.7a                                    | 11.4a | 53.6a                                    | 143.3a |

## Figure captions

**Fig. S1.** Map of the study site.

**Fig. S1**

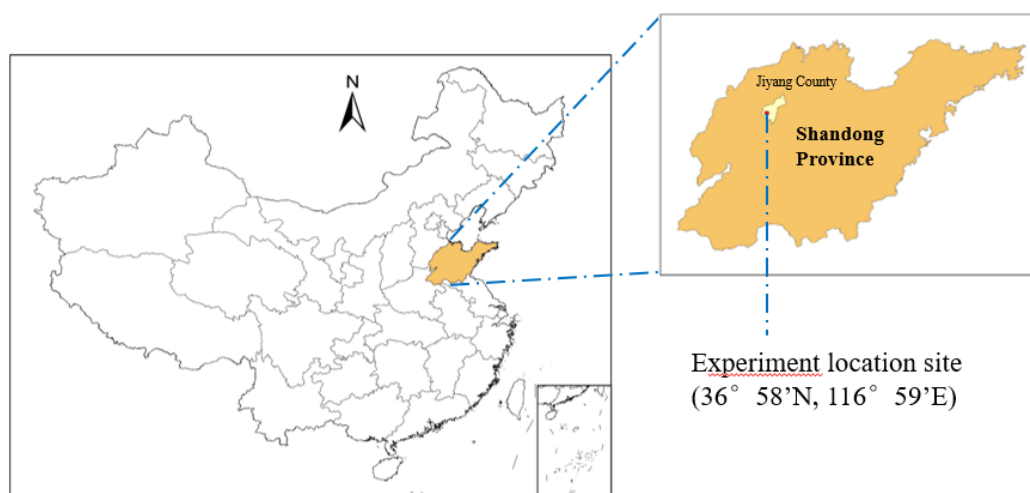

Supplement: s1 [file s1]
